# Supplementary material for: Efficacy and safety of ixekizumab through 52 weeks in two phase 3, randomised, controlled clinical trials in patients with active radiographic axial spondyloarthritis (COAST-V and COAST-W)
Source: PubMed Central journal article supplement — Ann Rheum Dis. 2019 Nov 4;79(2):176–85. doi: 10.1136/annrheumdis-2019-216118 (PMC7025731; doi:10.1136/annrheumdis-2019-216118), 2019-11-04
Supplement: annrheumdis-2019-216118supp001.pdf [file annrheumdis-2019-216118supp001.pdf]

**Table S1** Baseline demographics and clinical characteristics: COAST-V and COAST-W (Extended Treatment Period Population)

|                                                  | COAST-V (bDMARD-naïve) |                       |                               |                               | COAST-W (TNFi-experienced) |                               |                               |
|--------------------------------------------------|------------------------|-----------------------|-------------------------------|-------------------------------|----------------------------|-------------------------------|-------------------------------|
|                                                  | PBO/<br>IXE<br>(N=86)  | ADA/<br>IXE<br>(N=86) | IXE Q4W/<br>IXE Q4W<br>(N=78) | IXE Q2W/<br>IXE Q2W<br>(N=79) | PBO/<br>IXE<br>(N=93)      | IXE Q4W/<br>IXE Q4W<br>(N=98) | IXE Q2W/<br>IXE Q2W<br>(N=90) |
| Age, mean (SD), years                            | 42.7 (12.0)            | 41.5 (11.6)           | 40.8 (11.8)                   | 41.2 (11.4)                   | 47.1 (12.7)                | 47.1 (13.3)                   | 44.5 (10.5)                   |
| Male sex                                         | 71 (82.6)              | 70 (81.4)             | 65 (83.3)                     | 61 (77.2)                     | 77 (82.8)                  | 81 (82.7)                     | 68 (75.6)                     |
| Race                                             |                        |                       |                               |                               |                            |                               |                               |
| White                                            | 52 (60.5)              | 56 (65.1)             | 51 (65.4)                     | 50 (63.3)                     | 77 (82.8)                  | 78 (80.4)                     | 72 (80.0)                     |
| Asian                                            | 28 (32.6)              | 26 (30.2)             | 23 (29.5)                     | 23 (29.1)                     | 11 (11.8)                  | 12 (12.4)                     | 11 (12.2)                     |
| Other                                            | 6 (7.0)                | 4 (4.7)               | 4 (5.1)                       | 6 (7.6)                       | 5 (5.4)                    | 7 (7.2)                       | 7 (7.8)                       |
| Weight, mean (SD)                                | 79.9 (17.1)            | 78.6 (17.3)           | 77.8 (14.9)                   | 76.8 (13.9)                   | 85.0 (17.5)                | 86.2 (20.1)                   | 79.0 (17.1)                   |
| Duration of symptoms, mean (SD), years           | 16.6 (10.1)            | 15.7 (9.4)            | 15.8 (11.0)                   | 15.7 (10.9)                   | 20.2 (11.8)                | 18.2 (11.1)                   | 16.6 (9.3)                    |
| Time since axial SpA diagnosis, mean (SD), years | 6.8 (7.6)              | 7.6 (7.5)             | 8.3 (9.5)                     | 8.2 (9.1)                     | 13.1 (10.7)                | 9.7 (8.0)                     | 11.6 (8.4)                    |
| HLA-B27 positive                                 | 76 (89.4)              | 78 (90.7)             | 72 (92.3)                     | 73 (92.4)                     | 76 (81.7)                  | 81 (82.7)                     | 73 (81.1)                     |
| CRP concentration (mg/L), mean (SD)              | 16.0 (21.0)            | 12.8 (17.9)           | 12.5 (13.5)                   | 13.0 (15.2)                   | 17.2 (23.3)                | 19.5 (34.1)                   | 17.1 (20.4)                   |
| CRP >5 mg/L                                      | 60 (69.8)              | 51 (59.3)             | 52 (66.7)                     | 51 (64.6)                     | 60 (64.5)                  | 61 (62.2)                     | 65 (72.2)                     |
| ASDAS, mean (SD)                                 | 3.9 (0.7)              | 3.7 (0.9)             | 3.7 (0.7)                     | 3.8 (0.8)                     | 4.1 (0.8)                  | 4.2 (0.8)                     | 4.1 (0.8)                     |
| BASDAI, mean (SD)                                | 6.8 (1.2)              | 6.6 (1.5)             | 6.8 (1.3)                     | 6.7 (1.6)                     | 7.3 (1.3)                  | 7.4 (1.3)                     | 7.4 (1.2)                     |
| BASFI, mean (SD)                                 | 6.4 (1.9)              | 6.1 (2.0)             | 6.1 (1.8)                     | 6.3 (2.1)                     | 7.0 (1.7)                  | 7.2 (1.8)                     | 7.4 (1.4)                     |
| BASMI linear, mean (SD)                          | 4.5 (1.5)              | 4.2 (1.6)             | 3.9 (1.5)                     | 4.0 (1.4)                     | 4.9 (1.5)                  | 4.6 (1.5)                     | 4.7 (1.5)                     |
| Medication use                                   |                        |                       |                               |                               |                            |                               |                               |
| Methotrexate                                     | 8 (9.3)                | 8 (9.3)               | 9 (11.5)                      | 3 (3.8)                       | 17 (18.3)                  | 11 (11.2)                     | 9 (10.0)                      |
| Sulfasalazine                                    | 23 (26.7)              | 24 (27.9)             | 24 (30.8)                     | 24 (30.4)                     | 13 (14.0)                  | 16 (16.3)                     | 16 (17.8)                     |

|                     |           |           |           |           |           |           |           |
|---------------------|-----------|-----------|-----------|-----------|-----------|-----------|-----------|
| Oral corticosteroid | 6 (7.0)   | 9 (10.5)  | 12 (15.4) | 5 (6.3)   | 13 (14.0) | 9 (9.2)   | 11 (12.2) |
| NSAIDs              | 78 (90.7) | 80 (93.0) | 71 (91.0) | 76 (96.2) | 75 (80.6) | 75 (76.5) | 64 (71.1) |
| 1 prior TNFi        | NA        | NA        | NA        | NA        | 58 (62.4) | 62 (63.3) | 63 (70.0) |
| 2 prior TNFi        | NA        | NA        | NA        | NA        | 35 (37.6) | 36 (36.7) | 27 (30.0) |

Data are n (%) unless otherwise indicated.

ADA, adalimumab; ASDAS, Ankylosing Spondylitis Disease Activity Score; BASFI, Bath Ankylosing Spondylitis Functional Index; BASDAI, Bath Ankylosing Spondylitis Disease Activity Index; BASMI, Bath Ankylosing Spondylitis Metrology Index; bDMARD, biological disease-modifying antirheumatic drug; CRP, C-reactive protein; HLA, human leucocyte antigen; IXE Q4W, ixekizumab 80 mg every 4 weeks; IXE Q2W, ixekizumab 80 mg every 2 weeks; MRI, magnetic resonance imaging; NA, not applicable; NSAID, non-steroidal anti-inflammatory drug; PBO, placebo; SD, standard deviation; SpA, spondyloarthritis; TNFi, tumour necrosis factor inhibitor.
