# Supplementary material for: Efficacy and safety of ixekizumab through 52 weeks in two phase 3, randomised, controlled clinical trials in patients with active radiographic axial spondyloarthritis (COAST-V and COAST-W)
Source: PubMed Central journal article supplement — Ann Rheum Dis. 2019 Nov 4;79(2):176–85. doi: 10.1136/annrheumdis-2019-216118 (PMC7025731; doi:10.1136/annrheumdis-2019-216118), 2019-11-04
Supplement: annrheumdis-2019-216118supp006.pdf [file annrheumdis-2019-216118supp006.pdf]

**Table S6** Summary of individual inflammatory bowel disease cases reported in COAST-V (bDMARD-naïve) or COAST-W (TNF-experienced) through Week 52

| Study   | Sex/<br>Age*        | AS symptom<br>duration | Treatment<br>group  | Study<br>period | Prior GI medical<br>history                                               | AE      | Adjudication<br>result | IXE<br>exposure <sup>†</sup> | TNFi stop<br>before baseline <sup>‡</sup> |
|---------|---------------------|------------------------|---------------------|-----------------|---------------------------------------------------------------------------|---------|------------------------|------------------------------|-------------------------------------------|
| COAST-V | Male/<br>47 years   | 18 years               | IXE Q2W             | Week<br>0–16    | NSAID-induced<br>colitis                                                  | CD      | Probable               | 74 days                      | NA                                        |
| COAST-V | Female/<br>26 years | 11 years               | ADA/<br>IXE Q2W     | Week<br>16–52   | No relevant GI<br>history                                                 | CD      | Definitive             | 150 days                     | 178 days <sup>§</sup><br>(adalimumab)     |
| COAST-V | Female/<br>56 years | 37 years               | IXE Q4W/<br>IXE Q4W | Week<br>16–52   | UC since 2009                                                             | IBD nos | Probable               | 147 days                     | NA                                        |
| COAST-V | Female/<br>61 years | 28 years               | PBO/<br>IXE Q4W     | Week<br>16–52   | Gastritis,<br>peptic ulcer,<br>appendectomy                               | CD      | Probable               | 64 days                      | NA                                        |
| COAST-V | Female/<br>54 years | 18 years               | PBO/<br>IXE Q4W     | Week<br>16–52   | UC since 2015                                                             | UC      | Probable               | 191 days                     | NA                                        |
| COAST-W | Male/<br>66 years   | 25 years               | PBO                 | Week<br>0–16    | UC since 1983                                                             | UC      | Probable               | None                         | 181 days<br>(golimumab)                   |
| COAST-W | Male/<br>26 years   | 6 years                | IXE Q4W             | Week<br>0–16    | Intermittent<br>diarrhoea since<br>2011, anaemia<br>(2012–2014)           | IBD nos | Probable               | 41 days                      | 205 days<br>(certolizumab<br>pegol)       |
| COAST-W | Male/<br>36 years   | 14 years               | IXE Q4W             | Week<br>0–16    | Anal cyst and<br>fistula (2010–<br>NA), abdominal<br>pain (2010–<br>2016) | CD      | Probable               | 23 days                      | 68 days<br>(infliximab)                   |
| COAST-W | Male/<br>64 years   | 45 years               | IXE Q4W             | Week<br>0–16    | UC since 2002                                                             | UC      | Probable               | 1 day                        | 72 days<br>(adalimumab)                   |

\*Age at time of enrolment.

†Time of first IXE dose to time of event start in days.

‡TNFi stop before baseline: represent total days elapsed since last dose of TNFi to first dose of study drug.

§Time between last dose of ADA and first dose of IXE.

ADA, adalimumab; AE, adverse event; AS, ankylosing spondylitis; CD, Crohn's disease; GI, gastrointestinal; IBD nos, inflammatory bowel disease not otherwise specified; IXE, ixekizumab; IXE Q4W, ixekizumab 80 mg every 4 weeks; IXE Q2W, ixekizumab 80 mg every 2 weeks; NA, not applicable; PBO, placebo; TNFi, tumour necrosis factor inhibitor; UC, ulcerative colitis.
